# Supplementary material for: Non-Participation in Breast Cancer Screening in Spain and Potential Application in the Present and Future: A Cross Sectional Study
Source: MDPI journal article supplement (doi:10.3390/cancers13174331), 2021-08-27
Supplement: s1 [file s1]

## SUPPLEMENTAL MATERIAL

Mammography survey - Questionnaire used in the study  
(translation into English and original Spanish version)

### PERSONAL INFORMATION

---

1. Education:
  - a. No studies
  - b. Primary school
  - c. Secondary school
  - d. Baccalaureate/vocational training
  - e. University studies
2. Marital Status:
  - a. Single
  - b. Married
  - c. Widowed
  - d. Separated/Divorced
  - e. Other \_\_\_\_\_
3. Do you have any children?
  - a. Yes
  - b. No
4. Do you work outside the home?
  - a. Yes
  - b. No
5. Does the mobile mammography unit come to your town?
  - a. Yes
  - b. No
  - c. Don't know

### MAMMOGRAPHY SURVEY:

---

6. What do you consider to be the most important reason why you did not go for a mammography study? (please indicate only one reason):
  - a. You had a mammography in the previous year
  - b. You have regular check-ups with your gynaecologist, who referred you to undertake a mammography.
  - c. You did not receive the appointment on time
  - d. No one has told you what the test consists of and you think it may be painful or harmful to your health.
  - e. You are afraid
  - f. You think that having a mammography is useless.
  - g. It was totally impossible for you to travel to the location where the Mobile Unit was located.
  - h. You forgot that you had to go

7. Did you have a mammography last year?
- Yes
  - No
- If you answered yes, where was it done?
    - At the hospital
    - In a private practice
    - In the Breast Cancer programme
8. Do you have regular mammographys?
- Yes
  - No
- If yes, where is mammography usually performed?
    - In the public health system
    - In the private sector
  - Did you have mammographys because you have breast problems?
    - Yes
    - No
9. Did you receive your appointment on time for your mammography?
- Yes
  - No
- If you answered that you did not receive the appointment on time, can you please indicate the cause?
    - Absent from home for some time
    - Changed address
    - The appointment arrived but late
    - Did not receive any letter
10. Are you afraid of having a mammography?
- Yes
  - No
- If you answered yes, can you explain why you are afraid?
    - No one has informed you what it consists of
    - You think that it may hurt you or that it may harm your health
    - You are afraid of the results
    - Other causes: \_\_\_\_\_
11. Do you think having a mammography is helpful?
- Yes
  - No
- If you answered that you do not think it is useful, could you say why?
    - Because if the result is bad, you don't care if you have the mammography done before or after.
    - Because on one occasion you were told that the mammography showed 'doubtful results' and finally, there was nothing wrong.
    - Because an acquaintance of you was told that the mammography was normal and it turned out that she had a tumor.
    - You do not know

12. Did you have any problems travelling to the location where the Mobile Unit was located?
- a. Yes
  - b. No
  - If you answered yes, what was the main reason that prevented you from travelling?
    - i. Because you had no car and no one who could give you a ride.
    - ii. Because you were not willing to travel to get a mammography
    - iii. Because you could not leave your job
    - iv. Other Reasons: \_\_\_\_\_
13. Where do you prefer to have your mammography done?
- a. At the hospital
  - b. At the mobile unit
  - c. You don't mind
14. Is there any other reason or impediment why you did not go for a mammography?
- a. Yes
  - b. No
  - If you answered that there was some other reason why you did not attend, could you please state what it was?:
    - xxiv. You forgot the day you were supposed to go
    - xxv. You are embarrassed
    - xxvi. Out of reluctance, disinterest, don't feeling like it.
    - xxvii. An unforeseen event came up
    - xxviii. Due to physical limitation (disability)
    - xxix. Other causes: \_\_\_\_\_

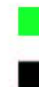

ENCUESTA SOBRE MAMOGRAFÍAS

FECHA: ..... / ..... / 2003

ENCUESTA PCM 00000

DATOS IDENTIFICATIVOS

Nombre y Apellidos: .....

Dirección: .....

C.P.: ..... Localidad: ..... Provincia: ☐ BA ☐ CC

Teléfono: .....

RESULTADO DE LA ENCUESTA

☐ Completa

☐ Incompleta (se negó a contestar determinadas preguntas)

☐ Fallida

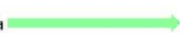

¿Causa?:

☐ No localizada

☐ Ausente

☐ Se niega

☐ Fallecimiento

☐ Es un hombre

OBSERVACIONES:

.....

.....

.....

.....

.....

.....

.....

.....

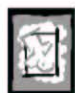

PROGRAMA DE DETECCIÓN PRECOZ DEL CÁNCER DE MAMA

## CUESTIONARIO

### DATOS PERSONALES

1. Estudios terminados:

- ☐ 1.1. Sin estudios
- ☐ 1.2. Primarios (EGB primera etapa)
- ☐ 1.3. Secundarios (EGB segunda etapa, bachillerato elemental)
- ☐ 1.4. Bachillerato / FP
- ☐ 1.5. Universitarios

2. Estado civil:

- ☐ 2.1. Soltera
- ☐ 2.2. Casada
- ☐ 2.3. Viuda
- ☐ 2.4. Separada / Divorciada
- ☐ 2.5. Otros (especificar): .....

3. ¿Tiene hijos?:

- ☐ Sí ☐ No

4. ¿Trabaja fuera de casa?:

- ☐ Sí ☐ No

5. ¿Va a la Unidad Móvil de Mamografía de su localidad?:

- ☐ Sí ☐ No ☐ No sabe

### ENCUESTA SOBRE MAMOGRAFÍAS

0. Señale cuál es la causa que considera **más importante** por la que no acudió a realizarse la **mamografía** (señalar sólo una causa):

- ☐ Tenía realizada una mamografía en el año anterior
- ☐ Hace revisiones de forma habitual con su ginecólogo y éste le solicita las mamografías
- ☐ No recibió la cita a tiempo
- ☐ Nadie le ha informado en qué consiste la prueba y piensa que puede resultar dolorosa o que perjudique su salud
- ☐ Tiene miedo
- ☐ Piensa que hacerse una mamografía no sirve para nada
- ☐ Le fue totalmente imposible desplazarse a la localidad donde estaba la Unidad Móvil
- ☐ Se le olvidó el día que tenía que ir

1. ¿Tenía realizada una **mamografía** el año anterior?:

- ☐ Sí ☐ No

• Si ha contestado que **Sí** la tenía realizada del año anterior, ¿dónde la realizó?:

- ☐ En el hospital
- ☐ En una consulta privada
- ☐ En el Programa de Cáncer de Mama

Continúa al dorso

2. ¿Se realiza **mamografías** periódicamente?:

☐ Sí ☐ No

• Si ha contestado que **Sí**, ¿dónde se realiza la **mamografía** habitualmente?:

☐ En la Sanidad Pública  
☐ En la Privada

• ¿Se hizo las **mamografías** porque tiene problemas en las mamas?:

☐ Sí ☐ No

3. ¿Recibió la cita a tiempo para realizarse la **mamografía**?:

☐ Sí ☐ No

• Si ha contestado que **NO** recibió la cita a tiempo, ¿puede indicar la causa?:

☐ Faltó de su domicilio algún tiempo  
☐ Cambió de domicilio  
☐ Llegó la citación, pero fuera de tiempo  
☐ No ha recibido ninguna carta

4. ¿Tiene **miedo** de realizarse la **mamografía**?:

☐ Sí ☐ No

• Si ha contestado que **Sí**, ¿puede explicar por qué tiene **miedo**?:

☐ Nadie le ha informado en qué consiste  
☐ Piensa que le puede doler o que puede perjudicar su salud  
☐ Teme al resultado  
☐ Otras causas (indíquelas si lo cree oportuno): .....

5. ¿Piensa que hacerse una **mamografía** es útil?:

☐ Sí ☐ No

• Si ha contestado que **NO** cree que sea útil, ¿podría decir por qué?

☐ Porque si el resultado es malo le va a dar igual hacérsela antes o después  
☐ Porque en una ocasión le dijeron que se veía "algo dudoso" en la **mamografía** y luego no era nada  
☐ Porque a una conocida suya le dijeron que la **mamografía** era normal y resultó tener un tumor  
☐ No sabe

6. ¿Tuvo algún problema para desplazarse a la localidad donde estaba situada la Unidad Móvil?:

☐ Sí ☐ No

• Si ha contestado que **Sí** tuvo problemas, ¿cuál fue el motivo principal que le impidió desplazarse?:

☐ Porque no tenía coche ni nadie que le pudiera llevar  
☐ Porque no está dispuesta a desplazarse para hacerse una **mamografía**  
☐ Porque no puede abandonar su puesto de trabajo  
☐ Otras causas (indíquelas si lo cree oportuno): .....

7. ¿Dónde prefiere realizarse la **mamografía**?:

☐ En el hospital  
☐ En la Unidad Móvil  
☐ Le da igual

8. ¿Existe alguna otra razón o impedimento por la que no asistiese a realizarse la **mamografía**?:

☐ Sí ☐ No

• Si ha contestado que **Sí** hubo alguna otra razón por la que no asistió, ¿podría decir cuál fue?:

☐ Se le olvidó el día que tenía que ir  
☐ Le da vergüenza  
☐ Por desgana, desinterés, inapetencia,...  
☐ Le surgió un imprevisto  
☐ Por limitación física (minusvalía)  
☐ Otras causas (indíquelas si lo cree oportuno): .....
